# Supplementary material
Source: ML conference proceedings conference paper supplement (https://openreview.net/forum?id=zq4bt_0z-gz)
Supplement: supplementary_material [file attachment]

|                    |                                                                                                                                                                                                            |
|--------------------|------------------------------------------------------------------------------------------------------------------------------------------------------------------------------------------------------------|
| Program $Y$        | $:= \text{Concat}(e_1, e_2, \dots)$                                                                                                                                                                        |
| Expression $e$     | $:= f \mid n \mid n_1(n_2) \mid n(f) \mid \text{ConstStr}(c)$                                                                                                                                              |
| Substring $f$      | $:= \text{SubStr}(k_1, k_2) \mid \text{GetSpan}(r_1, i_1, b_1, r_2, i_2, b_2)$                                                                                                                             |
| Nesting $n$        | $:= \text{GetToken}(t, i) \mid \text{ToCase}(s) \mid \text{Replace}(\delta_1, \delta_2) \mid \text{Trim}() \mid \text{GetUpto}(r) \mid \text{GetFrom}(r) \mid \text{GetFirst}(t, i) \mid \text{GetAll}(t)$ |
| Regex $r$          | $:= t_1 \mid \dots \mid t_n \mid \delta_1 \mid \dots \mid \delta_m$                                                                                                                                        |
| Type $t$           | $:= \text{NUMBER} \mid \text{WORD} \mid \text{ALPHANUM} \mid \text{ALL\_CAPS} \mid \text{PROP\_CASE} \mid \text{LOWER} \mid \text{DIGIT} \mid \text{CHAR}$                                                 |
| Case $s$           | $:= \text{PROPER} \mid \text{ALL\_CAPS} \mid \text{LOWER}$                                                                                                                                                 |
| Position $k$       | $:= -100 \mid -99 \mid \dots \mid 1 \mid 2 \mid \dots \mid 100$                                                                                                                                            |
| Index $i$          | $:= -5 \mid -4 \mid \dots \mid 1 \mid 2 \mid \dots \mid 5$                                                                                                                                                 |
| Boundary $b$       | $:= \text{START} \mid \text{END}$                                                                                                                                                                          |
| Delimiter $\delta$ | $:= \&, . ? @ ( ) [ ] \% \{ \} / ; \$ \# ' "$                                                                                                                                                              |
| Character $c$      | $:= A - Z \mid a - z \mid 0 - 9 \mid \&, . ? @ \dots$                                                                                                                                                      |

Figure 7: The DSL for string transformation tasks (Devlin et al., 2017)

## A EXTENDED DESCRIPTION OF DSL AND ROBUSTFILL MODEL

The DSL for string transformations we use is the same as used in RobustFill (Devlin et al., 2017), and is shown in Figure 7. The top-level operator for programs in the DSL is a Concat operator that concatenates a random number (up to 10) of expressions  $e_i$ . Each expression  $e$  can either be a substring expression  $f$ , a nesting expression  $n$ , or a constant string  $c$ . A substring expression can either return the substring between left  $k_1$  and right  $k_2$  indices, or between the  $i_1$ -th occurrence of regex  $r_1$  and  $i_2$ -th occurrence of regex  $r_2$ . The nesting expressions also return substrings of the input, such as extracting the  $i$ -th occurrence of a regex, but can also be composed with existing substring or nesting expressions for more complex string transformations.

**RobustFill Model** RobustFill (Devlin et al., 2017) is a seq-to-seq neural network that uses an encoder-decoder architecture where the encoder computes a representation of the input  $e(X)$ , and the decoder autoregressively generates the output given the source representation, i.e. conditional likelihood of  $Y = [y_1, \dots, y_T]$  decomposes as  $p(Y|X) = \prod_{t=1}^T p(y_t|y_{<t}, X)$ .

In RobustFill, the probability of decoding each token  $y_t$  is given by  $p(y_t|y_{<t}, X) = \text{Softmax}(W(h_t))$  with  $W$  being the projection onto logits, or unnormalized log probabilities. The hidden representation  $h_t$  is an LSTM hidden unit given by,

$$\begin{aligned} E_t &= \text{Attention}(h_{t-1}, e(X)), \\ h_t &= \text{LSTM}(h_{t-1}, E_t). \end{aligned}$$

Here  $e(X)$  is the sequence of hidden states after processing the specifications with an LSTM encoder, and  $\text{Attention}(Q, V)$  denotes the scaled dot-product attention with query  $Q$  and key-value sequence  $V$  (Bahdanau et al., 2016). In the case of  $X$  being multiple I/O examples, the RobustFill model of Devlin et al. (2017) uses double attention

$$\begin{aligned} s_{t,i}^I &= \text{Attention}(h_{t-1}, e(I_i)) \\ s_{t,i}^O &= \text{Attention}(\text{Concat}(h_{t-1}, s_{t,i}^I), e(O_i)) \\ h_{t,i} &= \text{LSTM}(h_{t-1}, \text{Concat}(s_{t,i}^I, s_{t,i}^O)) \quad \forall 1 \leq i \leq N, \end{aligned}$$

and hidden states are pooled across examples before being fed into the final softmax layer, or  $h_t = \text{maxpool}_{1 \leq i \leq N} \tanh(V(h_{t,i}))$ , where  $V$  is another projection.

## B EXAMPLES OF GENERATED PROGRAMS AND LATENT CODES

| Inputs            | Outputs                                                                      | LP Outputs    |
|-------------------|------------------------------------------------------------------------------|---------------|
| "Mason Smith"     | "Smith M"                                                                    | "Smith M"     |
| "Henry Myers"     | "Myers H"                                                                    | "Myers H"     |
| "Barry Underwood" | "Underwood B"                                                                | "Underwood B" |
| "Sandy Jones"     | "Jones S"                                                                    | "Jones S"     |
| LP                | GetToken_PROP_CASE_2   ConstStr(" ")   GetToken_CHAR_1(GetToken_PROP_CASE_1) |               |
| LP Latent         | TOK_30   TOK_13   TOK_39   TOK_30                                            |               |

  

| Inputs        | Outputs                                                       | LP Outputs |
|---------------|---------------------------------------------------------------|------------|
| "January 15"  | "jan 15"                                                      | "jan 15"   |
| "february 28" | "feb 28"                                                      | "feb 28"   |
| "march 1"     | "mar 1"                                                       | "mar 1"    |
| "October 31"  | "oct 31"                                                      | "oct 31"   |
| LP            | ToCase_LOWER(SubStr(1, 3))   ConstStr("")   GetToken_NUMBER_1 |            |
| LP Latent     | TOK_11   TOK_26   TOK_17                                      |            |

  

| Inputs           | Outputs                                                         | LP Outputs     |
|------------------|-----------------------------------------------------------------|----------------|
| "(321) 704 3331" | "321.704.3331"                                                  | "321.704.3331" |
| "(499) 123 3574" | "499.123.3574"                                                  | "499.123.3574" |
| "(555) 580 8390" | "555.580.8390"                                                  | "555.580.8390" |
| "(288)225 6116"  | "288.225.6116"                                                  | "288.225.6116" |
| LP               | GetToken_NUMBER_1   ConstStr(.)   Replace_" "_.(SubStr(-8, -1)) |                |
| LP Latent        | TOK_17   TOK_27   TOK_24   TOK_16                               |                |

  

| Inputs                                   | Outputs                                                                                         | LP Outputs |
|------------------------------------------|-------------------------------------------------------------------------------------------------|------------|
| "Milk 4, Yoghurt 12, Juice 2, Egg 5"     | "M.P."                                                                                          | "M.P."     |
| "US:38 China:35 Russia:27 India:1"       | "U.I."                                                                                          | "U.I."     |
| "10 Apple 2 Oranges 13 Bananas 40 Pears" | "A.P."                                                                                          | "A.P."     |
| "parul 7 rico 12 wolfram 15 rick 19"     | "P.R."                                                                                          | ".."       |
| LP                                       | GetToken_CHAR_1(GetToken_PROP_CASE_1)   Const(.)   GetToken_CHAR_-1(GetAll_ALL_CAPS)   Const(.) |            |
| LP Latent                                | TOK_39   TOK_30   TOK_6   TOK_38   TOK_30                                                       |            |

Figure 8: Latent codes and programs found by Latent Programmer in string transformation tasks. Red denotes I/O where the predicted program mapped input to an incorrect output.

| Docstring                                                    | Program                                                                                                                                                    |
|--------------------------------------------------------------|------------------------------------------------------------------------------------------------------------------------------------------------------------|
| get an environment variable                                  | def <code>set_key</code> (key, <code>val</code> , key_prefix=None):<br>return environ.get(key, key_prefix)                                                 |
| return a list of the words<br>in the string s                | def split(s, sep=None, maxsplit=-1):<br>return s.split(sep, maxsplit)                                                                                      |
| mean squared error function                                  | def mean_squared_error(y_true, y_pred):<br>return tf.reduce_mean(tf.square((y_true -<br>y_pred)))                                                          |
| read a python file                                           | def read_file(fname):<br><code>f = open(fname)</code><br>with open(fname, 'r') as f:<br><code>f.seek(0)</code><br>return f.read()                          |
| pickle dump                                                  | def pickle_ <code>save</code> (filename, data):<br>with open(filename, ' <code>r</code> ') as f:<br>pickle.dump(data, f)                                   |
| takes a timedelta and returns the<br>total number of seconds | def total_seconds(delta):<br>return ((delta. <code>microseconds</code> + ((delta.days<br>* 24) * 3600) * ( <code>10**6</code> )) / ( <code>10**6</code> )) |

Figure 9: Programs found by Latent Programmer in Python code generation dataset. Red denotes areas where the predicted program deviates from human code.
